# Supplementary material for: Relationship between Circulating 25-Hydroxyvitamin D and Metabolic Syndrome in Chinese Adults: A Large Nationwide Longitudinal Study
Source: MDPI journal article supplement (doi:10.3390/nu16101480), 2024-05-14
Supplement: s1 [file s1]

**Table S1.** Baseline characteristics of participants based on the status of serum 25(OH)D

| <b>Variables</b>            | <b>Overall<br/>(23,810)</b> | <b>Deficiency<br/>(4,260)</b> | <b>Insufficiency<br/>(10,213)</b> | <b>Sufficiency<br/>(9,337)</b> |
|-----------------------------|-----------------------------|-------------------------------|-----------------------------------|--------------------------------|
| Sex, n (%)                  |                             |                               |                                   |                                |
| Male                        | 12,596 (52.9)               | 1,711 (40.2)                  | 5,583 (54.7)                      | 5,302 (56.8)                   |
| Female                      | 11,214 (47.1)               | 2,549 (59.8)                  | 4,630 (45.3)                      | 4,035 (43.2)                   |
| Age, y                      | 43.6 (13.3)                 | 35.8 (11.9)                   | 41.3 (12.7)                       | 49.6 (11.9)                    |
| Age, n (%)                  |                             |                               |                                   |                                |
| 18-44                       | 12,683 (53.3)               | 3,336 (78.3)                  | 6,389 (62.6)                      | 2,958 (31.7)                   |
| 45-59                       | 8,227 (34.6)                | 729 (17.1)                    | 2,927 (28.7)                      | 4,571 (49.0)                   |
| ≥60                         | 2,900 (12.2)                | 195 (4.6)                     | 897 (8.8)                         | 1,808 (19.4)                   |
| Season,n (%)                |                             |                               |                                   |                                |
| Spring                      | 3,879 (16.3)                | 755 (17.7)                    | 1,846 (18.1)                      | 1,278 (13.7)                   |
| Summer                      | 6,131 (25.7)                | 663 (15.6)                    | 2,593 (25.4)                      | 2,875 (30.8)                   |
| Fall                        | 6,139 (25.8)                | 651 (15.3)                    | 2,357 (23.1)                      | 3,131 (33.5)                   |
| Winter                      | 7,661 (32.2)                | 2,191 (51.4)                  | 3,417 (33.5)                      | 2,053 (22.0)                   |
| Smoking, n (%)              | 4,852 (20.9)                | 539 (13.2)                    | 1,873 (18.8)                      | 2,440 (26.5)                   |
| Drinking, n (%)             | 6,969 (30.1)                | 885 (21.7)                    | 3,053 (30.8)                      | 3,031 (33.0)                   |
| 25(OH)D, ng/mL              | 18.8 (7.3)                  | 9.8 (1.6)                     | 16.0 (2.3)                        | 26.1 (5.4)                     |
| Abdominal obesity, n (%)    | 9,307 (40.3)                | 1,193 (29.6)                  | 3,972 (40.1)                      | 4,142 (45.1)                   |
| Hypertriglyceridemia, n (%) | 6,260 (26.7)                | 795 (19.4)                    | 2,780 (27.7)                      | 2,685 (28.9)                   |
| Low HDL-cholesterol, n (%)  | 4,550 (21.9)                | 792 (20.4)                    | 2,060 (22.8)                      | 1,698 (21.7)                   |
| Hypertension, n (%)         | 8,055 (34.4)                | 923 (22.4)                    | 3,119 (31.1)                      | 4,013 (43.4)                   |

|                           |              |              |              |              |
|---------------------------|--------------|--------------|--------------|--------------|
| Hyperglycemia, n (%)      | 8,829 (37.7) | 1,129 (27.4) | 3,573 (35.6) | 4,127 (44.5) |
| Metabolic syndrome, n (%) | 5,500 (26.9) | 692 (18.2)   | 2,353 (26.5) | 2,455 (31.6) |

---
